# Supplementary material for: A Cross-Sectional Study on the Prevalence and Risk Stratification of Chronic Kidney Disease in Cardiological Patients in São Paulo, Brazil
Source: MDPI journal article supplement (doi:10.3390/diagnostics13061146), 2023-03-16
Supplement: s1 [file s1]

**A cross-sectional study on the prevalence and risk stratification of chronic kidney disease in a referral cardiology hospital in São Paulo, Brazil.**

**Supplementary material**

Table S1. Univariate and multivariate analyses of factors related to reduced glomerular filtration rate (N=36,651)

| Variable                | eGFR <60<br>ml/min/1.73m <sup>2</sup><br>N (%) | Univariate |             |         | Multivariate |             |         |
|-------------------------|------------------------------------------------|------------|-------------|---------|--------------|-------------|---------|
|                         |                                                | OR         | CI 95%      | p-value | OR           | CI 95%      | p-value |
| Gender                  |                                                |            |             |         |              |             |         |
| Male                    | 5,656 (30.1)                                   | —          | —           |         | —            | —           |         |
| Female                  | 5,658 (31.7)                                   | 1.08       | 1.03-1.13   | <0.001  | 1.04         | 0.99-1.08   | 0.14    |
| Age                     |                                                |            |             |         |              |             |         |
| 18–29                   | 6 (2.5)                                        | —          | —           |         | —            | —           |         |
| 30-44                   | 76 (8.4)                                       | 3.60       | 1.68-9.36   | 0.003   | 3.80         | 1.78-9.89   | 0,002   |
| 45 - 59                 | 2,736 (25.5)                                   | 13.5       | 6.57 - 34.3 | <0.001  | 15,0         | 7.29- 38.0  | <0.001  |
| 60-74                   | 6,566 (30.7)                                   | 17.5       | 8.53 - 44.4 | <0.001  | 19.5         | 9.48-49.4   | <0.001  |
| >75                     | 1,930 (56.8)                                   | 52.0       | 25.2-132    | <0.001  | 57.0         | 27.7-145    | <0.001  |
| Main outpatient clinic  |                                                |            |             |         |              |             |         |
| Valvular heart disease  | 1,419 (27.3)                                   | —          | —           |         | —            | —           |         |
| Dyslipidemias           | 624 (29.2)                                     | 1.10       | 0.98-1.23   | 0.102   | 1.01         | 0.91 - 1.14 | 0.801   |
| Coronary artery disease | 3,429 (29.6)                                   | 1.12       | 1.04 - 1.20 | 0.003   | 1.04         | 0.97-1.12   | 0.289   |
| Hypertension            | 1,043 (31.2)                                   | 1.21       | 1.10-1.33   | <0.001  | 1.13         | 1.03-1.25   | 0.013   |
| Arrhythmias             | 1,164 (31.4)                                   | 1.22       | 1.11-1.34   | <0.001  | 1.18         | 1.08-1.30   | <0.001  |
| Cardiomyopathies        | 1,123 (32.4)                                   | 1.28       | 1.17-1.41   | <0.001  | 1.33         | 1.20-1.46   | <0.001  |
| Other                   | 2,512 (34.9)                                   | 1.43       | 1.32-1.55   | <0.001  | 1.36         | 1.25-1.47   | <0.001  |
| Total                   | 11,314 (30.9)                                  |            |             |         |              |             |         |

eGFR, estimated glomerular filtration rate; OR, Odds ratio; CI, confidence interval

Table S2. Univariate and multivariate analysis of factors related to urine albumin/creatinine ratio >30mg/g (N=19,031)

| Variable                | UACR > 30mg/g<br>N (%) | Univariate |             |         | Multivariate |             |         |
|-------------------------|------------------------|------------|-------------|---------|--------------|-------------|---------|
|                         |                        | OR         | CI 95%      | p-value | OR           | CI 95%      | p-value |
| Gender                  |                        |            |             |         |              |             |         |
| Male                    | 2,876 (30.1)           | —          | —           |         | —            | —           |         |
| Female                  | 2,561 (27.0)           | 0.86       | 0.80-0.91   | <0.001  | 0.83         | 0.78 - 0.89 | <0.001  |
| Age                     |                        |            |             |         |              |             |         |
| 18–29                   | 14 (23.3)              | —          | —           |         | —            | —           |         |
| 30-44                   | 75 (22.4)              | 0.95       | 0.49-1.82   | 0.872   | 0.95         | 0.51 - 1.89 | 0.888   |
| 45 - 59                 | 1,411 (26.0)           | 1.16       | 0.63-2.11   | 0,637   | 1.13         | 0.63-2.14   | 0,692   |
| 60-74                   | 3,237 (28.6)           | 1.32       | 0.72-2.39   | 0.371   | 1.29         | 0.72 - 2.44 | 0.413   |
| >75                     | 696 (36.9)             | 1.92       | 1.05-3.52   | 0.035   | 1.87         | 1.05-3.56   | 0.044   |
| Main outpatient clinic  |                        |            |             |         |              |             |         |
| Cardiomyopathies        | 489 (22.8)             | —          | —           |         | —            | —           |         |
| Arrhythmias             | 419 (24.1)             | 1.08       | 0.93-1.25   | 0.341   | 1.04         | 0.89-1.21   | 0.631   |
| Hypertension            | 761 (28.0)             | 1.32       | 1.15-1.50   | <0.001  | 1.30         | 1.39-1.48   | <0.001  |
| Coronary artery disease | 1,644 (28.7)           | 1.36       | 1.21 - 1.53 | <0.001  | 1.27         | 1.13-1.43   | <0.001  |
| Other                   | 948 (30.9)             | 1.51       | 1.33-1.72   | <0.001  | 1.41         | 1.24-1.61   | <0.001  |
| Valvular heart disease  | 637 (31.9)             | 1.58       | 1.38-1.82   | <0.001  | 1.57         | 1.36-1.80   | <0.001  |
| Dyslipidemias           | 535 (32.7)             | 1.65       | 1.43-1.90   | <0.001  | 1.60         | 1.39-1.85   | <0.001  |
| Total                   | 5,433 (28.6)           |            |             |         |              |             |         |

UACR, urine albumin/creatinine ratio; OR, Odds ratio; CI, confidence interval.

Table S3. Univariate and multivariate analyses of factors related to the highest risk categories of chronic kidney disease<sup>5</sup> (N=19,031)

| Variable                | High or very-high risk of CKD<br>N (%) | Univariate |             |         | Multivariate |             |         |
|-------------------------|----------------------------------------|------------|-------------|---------|--------------|-------------|---------|
|                         |                                        | OR         | CI 95%      | p-value | OR           | CI 95%      | p-value |
| Gender                  |                                        |            |             |         |              |             |         |
| Male                    | 2297 (24.1)                            | —          | —           |         | —            | —           |         |
| Female                  | 2300 (24.2)                            | 1.01       | 0.95-1.08   | 0.783   | 0.95         | 0.89-1.02   | 0.149   |
| Age                     |                                        |            |             |         |              |             |         |
| 18-29                   | 4 (6.7)                                | —          | —           |         | —            | —           |         |
| 30-44                   | 26 (7.8)                               | 1.18       | 0.40-3.51   | 0.768   | 1.24         | 0.42 - 3.37 | 0.704   |
| 45 - 59                 | 1094 (20.2)                            | 3.54       | 1.28-9.78   | 0.015   | 3.93         | 1.42-10.89  | 0.008   |
| 60-74                   | 2682 (23.7)                            | 4.34       | 1.57-11.99  | 0.005   | 4.86         | 1.76-13.41  | 0,002   |
| >75                     | 791 (41.9)                             | 10,11      | 3.65 - 28.0 | <0.001  | 10.91        | 3.94 - 30.2 | <0.001  |
| Main outpatient clinic  |                                        |            |             |         |              |             |         |
| Coronary artery disease | 1243 (21.7)                            | —          | —           |         | —            | —           |         |
| Hypertension            | 611 (22.5)                             | 1.05       | 0.94-1.17   | 0.396   | 1.08         | 0.96-1.20   | 0.208   |
| Valvular heart disease  | 465 (23.3)                             | 1.10       | 0.97-1.24   | 0.139   | 1.16         | 1.03-1.32   | 0,016   |
| Dyslipidemias           | 382 (23.4)                             | 1.10       | 0.97-1.26   | 0.144   | 1.12         | 0.98-1.28   | 0.089   |
| Cardiomyopathies        | 516 (24.1)                             | 1.15       | 1.02 - 1.29 | 0.023   | 1.27         | 1.13-1.43   | <0.001  |
| Arrhythmias             | 426 (24.5)                             | 1.17       | 1.03-1.33   | 0.013   | 1.21         | 1.07-1.38   | 0.003   |
| Other                   | 954 (31.1)                             | 1.63       | 1.48-1.80   | <0.001  | 1.56         | 1.41 - 1.73 | <0.001  |
| Total                   | 4597 (24.2)                            |            |             |         |              |             |         |

CKD, chronic kidney disease; OR, Odds ratio; CI, confidence interval.

Table S4. Studies evaluating the prevalence of chronic kidney disease in patients with cardiovascular disease

| Country                           | Year | Population              | Number of participants | Age (years) | Males (%) | Diabetes mellitus (%) | Equation for eGFR estimation | Use of two creatinine dosages three months apart for CKD confirmation | eGFR <60 ml/min/1.73m <sup>2</sup> | Proteinuria (%) | CKD (%) |
|-----------------------------------|------|-------------------------|------------------------|-------------|-----------|-----------------------|------------------------------|-----------------------------------------------------------------------|------------------------------------|-----------------|---------|
| Brazil <sup>a</sup>               | 2022 | Cardiovascular diseases | 36,651                 | 72          | 51        | -                     | CKD-EPI <sup>13</sup>        | No                                                                    | 31                                 | 28              | 39      |
|                                   |      | Coronary artery disease | 11,599                 | 72          | 66        | -                     | CKD-EPI <sup>13</sup>        | No                                                                    | 30                                 | 29              | 39      |
|                                   |      | Valvular heart disease  | 5,202                  | 70          | 42        | -                     | CKD-EPI <sup>13</sup>        | No                                                                    | 27                                 | 32              | 38      |
|                                   |      | Cardiomyopathies        | 3,462                  | 69          | 46        | -                     | CKD-EPI <sup>13</sup>        | No                                                                    | 32                                 | 23              | 37      |
|                                   |      | Arrhythmias             | 3,711                  | 72          | 47        | -                     | CKD-EPI <sup>13</sup>        | No                                                                    | 31                                 | 24              | 40      |
| Poland <sup>1</sup>               | 2020 | Valvular heart disease  | 1,205                  | 67          | 56        | 22                    | CKD-EPI <sup>13</sup>        | Yes                                                                   | 37                                 | -               | -       |
| Ethiopia <sup>2</sup>             | 2019 | Diseases Cardiovascular | 163                    | 42          | 44        | -                     | CKD-EPI <sup>13</sup>        | No                                                                    | 24                                 | 25              | -       |
| Thailand <sup>3</sup>             | 2017 | Hypertension artery     | 28,770                 | 63          | 37        | 52                    | CKD-EPI <sup>13</sup>        | No                                                                    | 38                                 | 62              | -       |
| Europe multinational <sup>4</sup> | 2017 | Coronary artery disease | 7,998                  | 65          | 76        | 27                    | CKD-EPI <sup>13</sup>        | No                                                                    | 21                                 | 20              | 38      |
| Global multinational <sup>5</sup> | 2016 | High risk               | 4,284                  | 50          | 38        | 17                    | CKD-EPI <sup>13</sup>        | No                                                                    | 8                                  | 15              | 36      |
| Spain <sup>6</sup>                | 2010 | Cardiovascular diseases | 2,608                  | 68          | 46        | 60                    | MDRD <sup>14</sup>           | No                                                                    | 28                                 | -               | -       |

| Country                     | Year | Population               | Number of participants | Age (years) | Males (%) | Diabetes mellitus (%) | Equation for eGFR estimation  | Use of two creatinine dosages three months apart for CKD confirmation | eGFR <60 ml/min/1.73m <sup>2</sup> | Proteinuria (%) | CKD (%) |
|-----------------------------|------|--------------------------|------------------------|-------------|-----------|-----------------------|-------------------------------|-----------------------------------------------------------------------|------------------------------------|-----------------|---------|
| United States <sup>7</sup>  | 2009 | Coronary artery disease  | 3,803                  | 63          | 45        | 23                    | MDRD <sup>14</sup>            | No                                                                    | 21                                 | -               | -       |
| China <sup>8</sup>          | 2007 | Coronary artery disease  | 3,513                  | 69          | 66        | 33                    | MDRD <sup>14</sup>            | No                                                                    | 25                                 | 8               | -       |
| Ireland <sup>9</sup>        | 2007 | Cardiovascular diseases  | 1,272                  | 66          | 72        | 12                    | MDRD <sup>14</sup>            | No                                                                    | 36                                 | -               | -       |
| Spain <sup>10</sup>         | 2006 | Hypertension and obesity | 4,585                  | 62          | 48        | 33                    | MDRD <sup>14</sup>            | No                                                                    | 23                                 | -               | -       |
| United States <sup>11</sup> | 2005 | Hypertension             | 5,897                  | 60          | 50        | 11                    | MDRD <sup>14</sup>            | No                                                                    | -                                  | 15              | 19      |
| United States <sup>12</sup> | 2003 | Coronary artery disease  | 4,584                  | 63          | 67        | 29                    | Cockcroft-Gault <sup>15</sup> | No                                                                    | 24                                 | -               | -       |

<sup>a</sup>Results of this study. eGFR, estimated glomerular filtration rate; CKD, chronic kidney disease, defined by eGFR < 60ml/min/1.73m<sup>2</sup> and/or proteinuria; Proteinuria, proteins in urinalysis 1+ or higher or albumin/creatinine ratio in spot urine sample >30mg/g; CKD-EPI, Chronic Kidney Disease Epidemiology Collaboration; MDRD, Modification of Diet in Renal Disease

## References

1. Kuźma, Ł.; Małyszko, J.; Bachórzewska-Gajewska, H.; Niwińska, M.M.; Kurasz, A.; Zalewska-Adamiec, M.; Koźuch, M.; Dobrzycki, S. Impact of chronic kidney disease on long-term outcome of patients with valvular heart defects. *Int. Urol. Nephrol.* **2020**, *52*, 2161–2170.
2. Chala, G.; Sisay, T.; Teshome, Y. Chronic Kidney Disease And Associated Risk Factors Among Cardiovascular Patients. *Int. J. Nephrol. Renov. Dis.* **2019**, *12*, 205–211.
3. Krittayaphong, R.; Rangsin, R.; Thinkhamrop, B.; Hurst, C.; Rattanamongkolgul, S.; Sripaiboonkij, N.; Wangworatrakul, W. Prevalence of chronic kidney disease associated with cardiac and vascular complications in hypertensive patients: A multicenter, nation-wide study in Thailand. *BMC Nephrol.* **2017**, *18*, 115. <https://doi.org/10.1186/s12882-017-0528-3>.
4. Wagner, M.; Wanner, C.; Kotseva, K.; Wood, D.; De Bacquer, D.; Rydén, L.; Störk, S.; Heuschmann, P.U.; EUROASPIRE IV Investigators. Prevalence of chronic kidney disease and its determinants in coronary heart disease patients in 24 European countries: Insights from the EUROASPIRE IV survey of the European Society of Cardiology. *Eur. J. Prev. Cardiol.* **2017**, *24*, 1168–1180. <https://doi.org/10.1177/2047487317708891>.
5. Ene-Iordache, B.; Perico, N.; Bikbov, B.; Carminati, S.; Remuzzi, A.; Perna, A.; Islam, N.; Bravo, R.F.; Aleckovic-Halilovic, M.; Zou, H.; et al. Chronic kidney disease and cardiovascular risk in six regions of the world (ISN-KDDC): A cross-sectional study. *Lancet Glob. Health* **2016**, *4*, e307–e319. [https://doi.org/10.1016/s2214-109x\(16\)00071-1](https://doi.org/10.1016/s2214-109x(16)00071-1).
6. Cases Amenós, A.; González-Juanatey, J.R.; Conthe Gutiérrez, P.; Matali Gilarranz, A.; Garrido Costa, C. Prevalence of chronic kidney disease in patients with or at a high risk of cardiovascular disease. *Rev. Esp. Cardiol.* **2010**, *63*, 225–228. [https://doi.org/10.1016/s1885-5857\(10\)70041-4](https://doi.org/10.1016/s1885-5857(10)70041-4).
7. McClellan, W.M.; Newsome, B.B.; McClure, L.A.; Cushman, M.; Howard, G.; Audhya, P.; Abramson, J.L.; Warnock, D.G. Chronic Kidney Disease Is Often Unrecognized among Patients with Coronary Heart Disease: The REGARDS Cohort Study. *Am. J. Nephrol.* **2009**, *29*, 10–17. <https://doi.org/10.1159/000148645>.
8. Liu, H.; Yu, J.; Chen, F.; Li, J.; Hu, D. Inpatients with coronary heart disease have a high prevalence of chronic kidney disease based on estimated glomerular filtration rate (eGFR) in China. *Heart Vessel.* **2007**, *22*, 223–228. <https://doi.org/10.1007/s00380-006-0964-7>.
9. Glynn, L.G.; Reddan, D.; Newell, J.; Hinde, J.; Buckley, B.; Murphy, A. Chronic kidney disease and mortality and morbidity among patients with established cardiovascular disease: A West of Ireland community-based cohort study. *Nephrol. Dial. Transplant.* **2007**, *22*, 2586–2594. <https://doi.org/10.1093/ndt/gfm222>.
10. Gomez, P.; Ruilope, L.M.; Barrios, V.; Navarro, J.; Prieto, M.A.; Gonzalez, O.; Guerrero, L.; Zamorano, M.A.S.; Filozof, C.; FATH Study Group. Prevalence of Renal Insufficiency in Individuals with Hypertension and Obesity/Overweight: The FATH Study. *J. Am. Soc. Nephrol.* **2006**, *17* (Suppl. 3), S194–S200. <https://doi.org/10.1681/asn.2006080914>.
11. Kramer, H.; Luke, A.; Bidani, A.; Cao, G.; Cooper, R.; McGee, D. Obesity and Prevalent and Incident CKD: The Hypertension Detection and Follow-Up Program. *Am. J. Kidney Dis.* **2005**, *46*, 587–594. <https://doi.org/10.1053/j.ajkd.2005.06.007>.
12. Reddan, D.N.; Szczech, L.A.; Tuttle, R.H.; Shaw, L.K.; Jones, R.H.; Schwab, S.J.; Smith, M.S.; Califf, R.M.; Mark, D.B.; Owen, W.F. Chronic Kidney Disease, Mortality, and Treatment Strategies among Patients with Clinically Significant Coronary Artery Disease. *J. Am. Soc. Nephrol.* **2003**, *14*, 2373–2380. <https://doi.org/10.1097/01.asn.0000083900.92829.f5>.
13. Levey, A.S.; Stevens, L.A.; Schmid, C.H.; Zhang, Y.L.; Castro, A.F., III.; Feldman, H.I.; Kusek, J.W.; Eggers, P.; Van Lente, F.; Greene, T.; et al. A New Equation to Estimate Glomerular Filtration Rate. *Ann. Intern. Med.* **2009**, *150*, 604–612. <https://doi.org/10.7326/0003-4819-150-9-200905050-00006>.
14. Levey, A.S.; Bosch, J.P.; Lewis, J.B.; Greene, T.; Rogers, N.; Roth, D. A more accurate method to estimate glomerular filtration rate from serum creatinine: a new prediction equation. Modification of Diet in Renal Disease Study Group. *Ann. Intern. Med.* **1999**, *130*, 461–470. <https://doi.org/10.7326/0003-4819-130-6-199903160-00002>.
15. Cockcroft, D.W.; Gault, M.H. Prediction of creatinine clearance from serum creatinine. *Nephron* **1976**, *16*, 31–41.
